# Supplementary material for: Overexpression of Hypo-Phosphorylated IκBβ at Ser313 Protects the Heart against Sepsis
Source: PLoS One. 2016 Aug 10;11(8):e0160860. doi: 10.1371/journal.pone.0160860 (PMC4979969; doi:10.1371/journal.pone.0160860)
Supplement: S3 Dataset — (XLSX) [file pone.0160860.s003.xlsx]

## Sheet: Sheet1
EGFP mRNA(fold change)							serum IL-6(ng/ml)
0	3	6	12	24					WT						Tg
1	1.261	1.411	1.912	1.513				0	0.016	0.022	0.018	0.0197	0.017	0.0204	0.017	0.019	0.0202	0.017	0.019	0.019
1	1.307	1.489	1.731	1.644				3	0.023	0.0196	0.021	0.026	0.023	0.022	0.018	0.023	0.022	0.025	0.024	0.022
1	1.188	1.263	1.848	1.441				6	1.024	1.975	1.431	1.782	1.187	1.393	0.722	0.832	1.537	0.973	1.174	1.078
								12	3.287	2.832	2.237	2.499	2.043	2.527	1.673	2.322	1.411	1.548	1.613	2.529
								24	4.534	3.785	4.485	5.603	4.032	4.754	3.054	4.524	3.474	3.289	3.175	3.943
Percent survival(%)
Time(h)	WT	Tg		1=death	0=survival
8	0	0						serum TNF-α(ng/ml)
16	1	0							WT						Tg
16	1							0	0.025	0.036	0.028	0.031	0.033	0.035	0.026	0.034	0.036	0.031	0.033	0.031
16	1	0						3	0.027	0.029	0.034	0.036	0.037	0.036	0.029	0.031	0.036	0.037	0.034	0.034
16	1							6	0.374	0.427	0.339	0.485	0.586	0.264	0.337	0.285	0.31	0.352	0.364	0.389
24	1	0						12	2.965	3.212	2.515	2.791	2.865	2.738	2.125	2.365	1.835	1.979	2.085	2.225
24	1							24	6.614	5.834	5.409	6.237	6.433	7.018	4.948	5.381	4.472	5.627	4.873	4.651
24	1
24	1
32	1	1						IL-6 mRNA(fold change)
32	1	1							WT						Tg
32	1	1						0	1	0.377623	0.763685	0.923475	1.23537	1.03475	0.377707	3.56029	0.700992	0.632435	0.974879	1.12447
32	1							3	11.2346	6.23546	16.2345	8.23546	10.2344	7.34672	8.32524	5.43623	10.3462	14.6425	13.2453	8.32542
40	1	1						6	32.1343	28.3563	35.3452	26.2363	37.2345	26.2624	17.2532	19.2345	22.3235	14.2345	11.2536	13.2632
40	1	1						12	89.9171	37.8917	69.2368	58.5625	77.2355	64.2424	24.4337	17.2621	25.2352	31.2346	28.1236	24.2453
48	1	1						24	110.252	94.1235	73.6325	68.2537	84.3624	95.2564	55.2388	48.8468	39.7325	50.5423	47.4723	42.5653
48	1	1
56	1
56	1	1						TNF-α mRNA(fold change)
64	1	1							WT						Tg
64	1	1						0	1	1.57755	0.773452	0.923475	1.23537	1.03475	1.31303	1.72754	0.700992	0.632435	0.974879	1.12447
72		1						3	6.24364	7.23157	10.2346	7.34262	6.25265	8.35348	6.34253	5.32646	6.23457	8.23547	7.32635	7.23457
72		0						6	50.6536	79.2345	82.2365	65.6346	77.3654	64.3264	33.2345	21.3254	19.3654	25.3636	16.2354	27.3453
72		0						12	77.3824	124.433	144.598	133.536	117.325	153.254	68.3487	78.4146	53.4818	33.3402	48.6346	55.3464
72		0						24	99.2354	113.563	147.352	198.237	173.426	136.674	85.8794	92.3463	68.3254	75.2343	101.745	83.2154
72		0
72		0
72		0
72		0
