# Supplementary material for: Overexpression of Hypo-Phosphorylated IκBβ at Ser313 Protects the Heart against Sepsis
Source: PLoS One. 2016 Aug 10;11(8):e0160860. doi: 10.1371/journal.pone.0160860 (PMC4979969; doi:10.1371/journal.pone.0160860)
Supplement: S6 Dataset — (XLSX) [file pone.0160860.s006.xlsx]

## Sheet: Sheet1
LC3B-II/GAPDH
	WT			Tg
0	0.133	0.122	0.105	0.242	0.223	0.247
3	0.155	0.121	0.117	0.293	0.269	0.322
6	0.327	0.306	0.358	0.584	0.551	0.621
12	0.327	0.359	0.303	0.673	0.635	0.706
Atg5/GAPDH
	WT			Tg
0	0.308	0.276	0.334	0.438	0.459	0.411
3	0.255	0.281	0.231	0.299	0.333	0.269
6	0.177	0.155	0.206	0.252	0.224	0.282
12	0.042	0.083	0.041	0.513	0.542	0.488
Beclin-1/GAPDH
	WT			Tg
0	0.264	0.273	0.251	0.376	0.346	0.416
3	0.098	0.107	0.075	0.446	0.419	0.473
6	0.338	0.311	0.351	0.425	0.452	0.401
12	0.099	0.067	0.128	0.261	0.226	0.294
p62/GAPDH
	WT			Tg
0	0.736	0.747	0.764	0.628	0.661	0.603
3	0.442	0.446	0.475	0.413	0.393	0.435
6	0.404	0.428	0.453	0.278	0.252	0.308
12	0.405	0.383	0.419	0.309	0.283	0.326
