# Supplementary material for: Overexpression of Hypo-Phosphorylated IκBβ at Ser313 Protects the Heart against Sepsis
Source: PLoS One. 2016 Aug 10;11(8):e0160860. doi: 10.1371/journal.pone.0160860 (PMC4979969; doi:10.1371/journal.pone.0160860)
Supplement: S7 Dataset — (XLSX) [file pone.0160860.s007.xlsx]

## Sheet: Sheet1
cathepsin L/GAPDH
	WT			Tg
0	0.425	0.395	0.455	0.432	0.399	0.459
3	0.177	0.159	0.192	0.174	0.154	0.158
6	0.205	0.231	0.171	0.557	0.516	0.582
12	0.442	0.398	0.483	0.786	0.808	0.754
cathepsin L mRNA
(fold change)
	WT			Tg
0	1	1	1	1.04	0.92	1.16
3	1.775	1.895	1.655	2.232	2.412	2.052
6	2.593	2.433	2.753	4.258	5.208	3.308
12	3.343	3.503	3.183	6.021	6.181	5.861
